# Supplementary material
Source: Springer Nature journal article supplement (https://www.springermedizin.de/resource/supplementary/12885_2008_1436_MOESM3_ESM.pdf/9472000)

**BST2 protein**

**$\beta$ -Actin**

*MCF-10A*

*HTB-121*

*UACC812*

*MCF-7*

*T47D*

*MDA-468*

*BC-701*

*MDA-231*

*MDA-231BO*

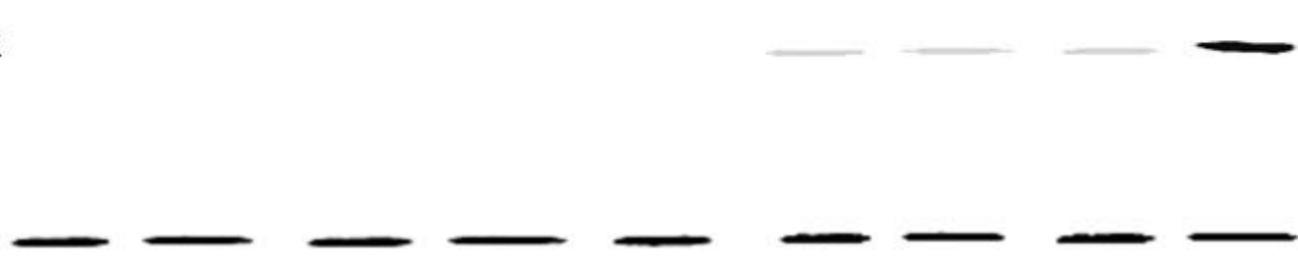

Supplement: MOESM3 [file 9472000]
